# Supplementary material for: Photoelectrochemical water reduction over wide gap (Ag,Cu)(In,Ga)S2 thin film photocathodes
Source: Royal Society of Chemistry journal article supplement (doi:10.1039/c7cp01348e), 2017-01-01
Supplement: c7cp01348e1.pdf [file c7cp01348e1.pdf]

## Supporting Information

# Photoelectrochemical Water Reduction over Wide Gap (Ag,Cu)(In,Ga)S<sub>2</sub> Thin Film Photocathodes

*Wilman Septina,<sup>ab</sup> Minoru Sugimoto,<sup>b</sup> Ding Chao,<sup>c</sup> Qing Shen,<sup>c</sup> Shigeru Nakatsuka,<sup>d</sup> Yoshitaro Nose,<sup>d</sup> Takashi Harada,<sup>b</sup> Shigeru Ikeda<sup>\*e</sup>*

<sup>a</sup>Department of Chemistry, University of Zurich, Winterthurerstrasse 190, CH-8057 Zurich, Switzerland

<sup>b</sup>Research Center for Solar Energy Chemistry, Osaka University, 1-3 Machikaneyama, Toyonaka, Osaka 560-8531, Japan

<sup>c</sup>Department of Engineering Science, Faculty of Informatics and Engineering, The University of Electro-Communications, 1-5-1 Chofugaoka, Chofu, Tokyo 182-8585, Japan.

<sup>d</sup>Department of Materials Science and Engineering, Kyoto University, Kyoto 606-8501, Japan

<sup>e</sup>Department of Chemistry, Konan University, 8-9-1 Okamoto, Higashinada, Kobe 658-8501, Japan

### Corresponding Author

\*E-mail: [s-ikeda@center.konan-u.ac.jp](mailto:s-ikeda@center.konan-u.ac.jp)

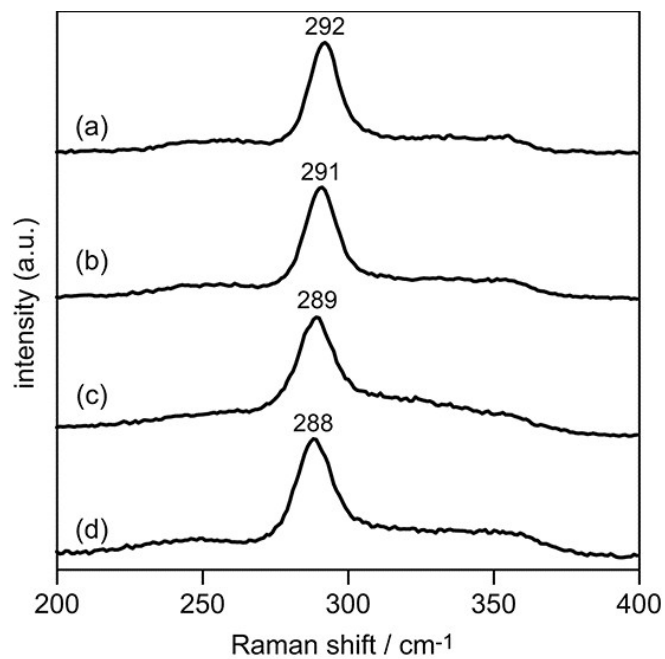

Figure S1. Raman spectra of (a) A(0)CIGS, (b) A(0.1)CIGS, (c) A(0.2)CIGS, and (d) A(0.3)CIGS films.

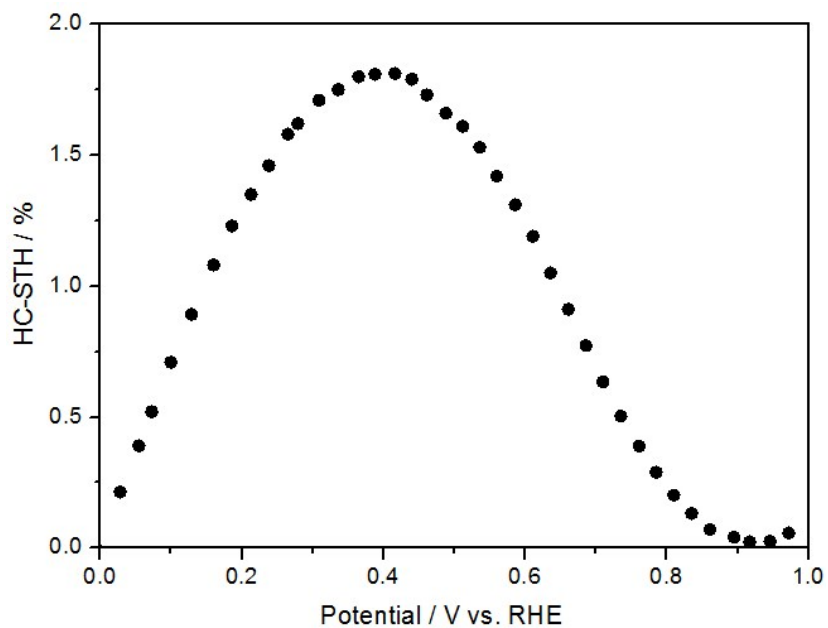

Figure S2. HC-STH spectrum of Pt-CdS/A(0.2)CIGS extracted from its  $J-V$  curve.

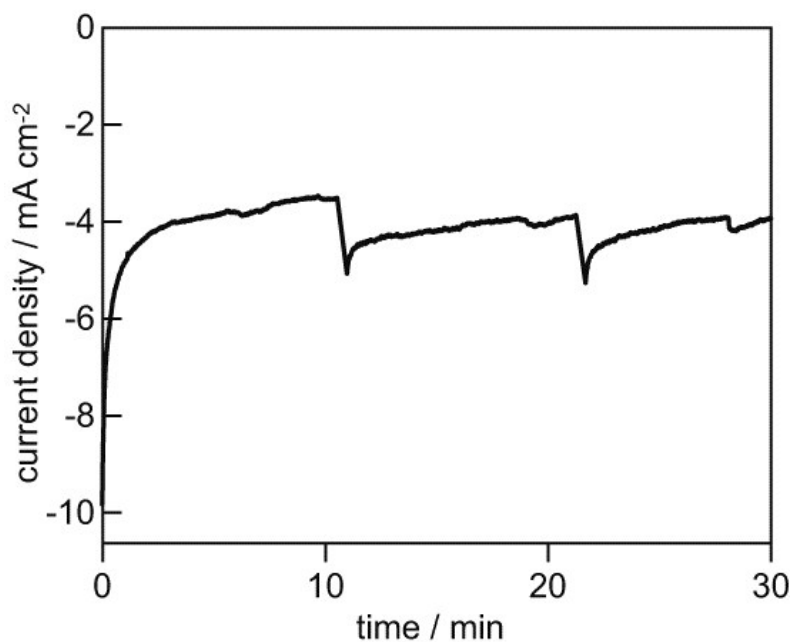

Figure S3. Time-course profile of Pt-CdS/A(0.2)CIGS measured in a sulfate-phosphate solution (pH 6.5) at 0 V vs. RHE under constant illumination from AM 1.5G solar simulator. The sudden drops of the photocurrent at *ca.* 10 min and 22 min were caused by removal of H<sub>2</sub> bubbles attached in the sample.

**Table S1.** Elemental compositions of sulfurized A(x)CIGS films obtained from various Ag/(Ag+Cu) ratio in the precursor solution.

| Sample     | Ag (%at.) | Cu (%at.) | In (%at.) | Ga (%at.) | S (%at.) | Ag/(Ag+Cu)<br>in the films |
|------------|-----------|-----------|-----------|-----------|----------|----------------------------|
| A(0)CIGS   | 0         | 23.39     | 17.20     | 5.26      | 54.14    | 0                          |
| A(0.1)CIGS | 2.15      | 21.31     | 18.82     | 5.25      | 52.46    | 0.09                       |
| A(0.2)CIGS | 4.62      | 18.92     | 19.65     | 5.18      | 51.65    | 0.20                       |
| A(0.3)CIGS | 6.87      | 17.43     | 19.14     | 5.60      | 50.95    | 0.28                       |

**Table S2.** Resistivity of A(x)CIGS films with various Ag contents deposited on a glass substrate

| ACIGS Samples | Resistivity ( $\Omega$ .cm) |
|---------------|-----------------------------|
| A(0)CIGS      | $5.9 \times 10^6$           |
| A(0.1)CIGS    | $1.9 \times 10^5$           |
| A(0.2)CIGS    | $3.6 \times 10^6$           |
| A(0.3)CIGS    | $2.4 \times 10^7$           |
